# Supplementary material for: Non-Stacked γ-Fe2O3/C@TiO2 Double-Layer Hollow Nanoparticles for Enhanced Photocatalytic Applications under Visible Light
Source: MDPI journal article supplement (doi:10.3390/nano12020201), 2022-01-07
Supplement: s1 [file s1]

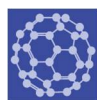

# Non-Stacked $\gamma$ -Fe<sub>2</sub>O<sub>3</sub>/C@TiO<sub>2</sub> Double-Layer Hollow Nanoparticles for Enhanced Photocatalytic Applications under Visible Light

Xun Sun <sup>1,\*</sup>, Xiao Yan <sup>1</sup>, Huijuan Su <sup>1</sup>, Libo Sun <sup>1</sup>, Lijun Zhao <sup>1</sup>, Junjie Shi <sup>1</sup>, Zifan Wang <sup>2,\*</sup>, Jianrui Niu <sup>3</sup>, Hengli Qian <sup>3</sup> and Erhong Duan <sup>3,\*</sup>

<sup>1</sup> Yantai Key Laboratory of Gold Catalysis and Engineering, Shandong Applied Research Center of Gold Nanotechnology (Au-SDARC), School of Chemistry & Chemical Engineering, Yantai University, Yantai 264005, China; yzheng@ytu.edu.cn (X.Y.); suhuijuan2012@ytu.edu.cn (H.S.); sunlibo@ytu.edu.cn (L.S.); zhaoljytu@ytu.edu.cn (L.Z.); junjieshi@ufl.edu (J.S.)

<sup>2</sup> Biomedical Research Center, Northwest Minzu University, Lanzhou 730000, China

<sup>3</sup> School of Environmental Science and Engineering, Hebei University of Science and Technology, Shijiazhuang 050018, China; niujianrui@hebust.edu.cn (J.N.); 211706022@stu.hubest.edu.cn (H.Q.)

\* Correspondence: sunxun@ytu.edu.cn (X.S.); zifan.wang@mso.umt.edu (Z.W.); deh@hebust.edu.cn (E.D.)

As shown in Figure S1, the catalytic activity of non-stacked  $\gamma$ -Fe<sub>2</sub>O<sub>3</sub>/C@TiO<sub>2</sub> decreased by only 5.0% during no less than 5 catalytic cycles, which showed enhanced reusability of catalyst applied in degradation of phenol.

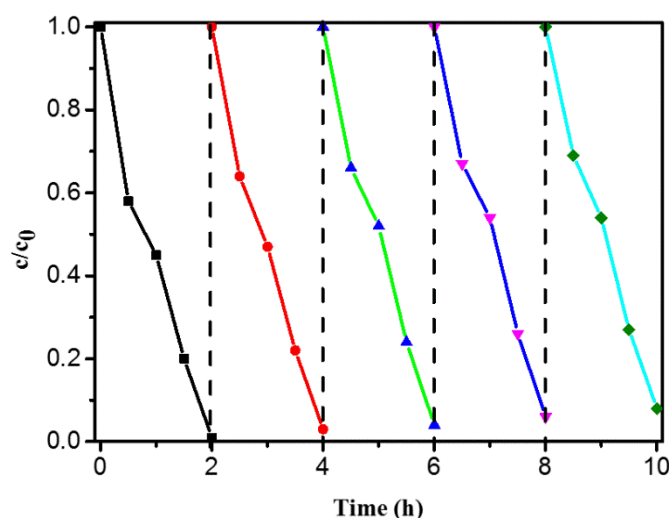

Figure S1. The lifetime of Non-stacked  $\gamma$ -Fe<sub>2</sub>O<sub>3</sub>/C@TiO<sub>2</sub>.
